# Supplementary material for: Adsorption properties and mechanism of Pb<sup>2+</sup> in hydrothermal carbon solution of modified banana peel
Source: Preprints.org preprint supplement (doi:10.20944/preprints202310.1866.v1), 2023-10-30
Supplement: Supplementary file 1 [file supplementary]

# PERSONAL RESUME

## • Personal information

**Name :** Zhiping Jin

**Professional :** Thermal Power Plant

**Email :** jinzhipingc@126.com

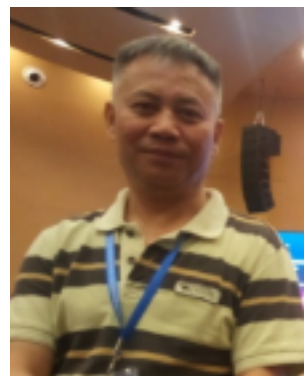

## • Education background

|                 |                                  |               |
|-----------------|----------------------------------|---------------|
| 1979.09-1983.07 | Taiyuan University of Technology |               |
|                 | Thermal Power Plant              | Undergraduate |

## • Work Experience

Professor, Master Supervisor, Shanxi University.

Registered Power Engineer for survey and design, Ministry of Construction.

Registered Environmental Engineer.

He has served as the director of Adult Education, the director of Academic Affairs and the Vocational School of library. Member of Teaching Committee of Energy Power Engineering of China Electric Power Education Association, secretary-general of teaching steering committee of Electric Power Technology of Ministry of Education.

## • Recent publications

- 1.Tao Bai, Zhiping Jin. Thermodynamic analysis of condensation water saving and waste heat recovery of coal-fired flue gas [ J ] . Journal of Power Engineering, 2022,42(10) : 978-985.
- 2.Tao Bai, Zhiping Jin. Thermodynamic analysis of heat pump heating system based on flue gas waste heat recovery [ J ] . Journal of Electric Power, 2023,38(02) : 117-126. DOI: 10.13357/J. DLXB. 2023.013.
- 3.Wenping Peng, Zhiping Jin, Gaolin Lu, etc. . Dynamic characteristics of sensible heat recovery and heat transfer process of coking raw gas riser [ J ] . Clean coal technology, 2023,29(02) : 180-189. DOI: 10.13226/J. ISSN. 1006-6772.21121302.
