# Supplementary material for: Adsorption properties and mechanism of Pb<sup>2+</sup> in hydrothermal carbon solution of modified banana peel
Source: Preprints.org preprint supplement (doi:10.20944/preprints202310.1866.v1), 2023-10-30
Supplement: Supplementary file 2 [file supplementary]

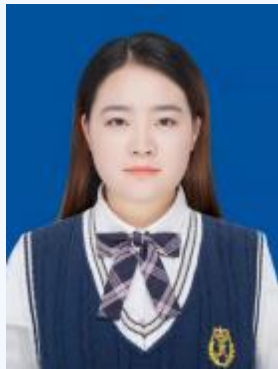

# Jiaxin Zhao

Telephone: 15735513848

Mailbox: 15735513848@163.com

Address: No. 92 Wucheng Road, Taiyuan, Shanxi, P.R. China

## Educational background

---

Shanxi University - New Energy Science and  
Engineering - Bachelor degree

2017.09-2021.06

academic major: Heat transfer, thermodynamics, fluid chemistry, photovoltaics, etc.

Shanxi University - engineer and power - Graduate student

2022.09-Present

Research direction: Mainly engaged in biochar adsorption of organic macromolecules.

## Student Experience

---

Shanxi Guojin Coal Power Co. , Ltd.

Participate in the project:

Study on carbon capture system of coal-fired power plant assisted by solar energy

## Work experience

---

Assistant Professor of University physics experiment 2023.09

Content: Responsible for assisting teachers to carry out experimental teaching,

including experimental guidance, tour inspection, experimental equipment arrangement,  
experimental records, experimental equipment warranty, to

assist teachers to correct the experimental report to determine the experimental  
results.

## Certificate of Honor

---

Honor: The University of Shanxi three good students, postgraduate scholarship

Certificate: Mandarin two Grade A, college English four
