# Supplementary material for: Adsorption properties and mechanism of Pb<sup>2+</sup> in hydrothermal carbon solution of modified banana peel
Source: Preprints.org preprint supplement (doi:10.20944/preprints202310.1866.v1), 2023-10-30
Supplement: Supplementary file 3 [file supplementary]

Archive with 6 entries (6 files):
- 张璐明.pdf
- 田来鑫.pdf
- 白涛.pdf
- 赵嘉欣.pdf
- 靳智平.pdf
- 幺玉虎.pdf
