# Supplementary material for: Adsorption properties and mechanism of Pb<sup>2+</sup> in hydrothermal carbon solution of modified banana peel
Source: Preprints.org preprint supplement (doi:10.20944/preprints202310.1866.v1), 2023-10-30
Supplement: Supplementary file 3 [file supplementary › 幺玉虎.pdf]

# YuHu Yao

☎ Mobile:15536827339

📍 Address:No.92Wucheng Road,Taiyuan,Shanxi,P.R.China

✉ E-mail:yyhusxdx@.163.com

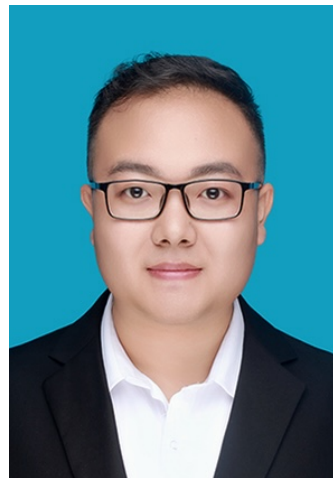

## Education

2021/09-Present      Shanxi University      Energy and Power

Candidate for Master degree in Energy and Power, expected July, 2024

Advanced Heat Transfer    Advanced Engineering Thermodynamics      Advanced Fluid Mechanics

New Energy and Efficient Utilization of Energy      Foundation of Applied Mathematics

Language: Native Mandarin, Excellent English (CET-6)

Computer: Third-level Certificate for National Computer

2017/09-2021/07      Shanxi University      Energy and Power Engineering

Candidate for bachelor degree in Energy and Power Engineering, July, 2021

Heat Transfer    Engineering Thermodynamics    Fluid Mechanics    Psychrometrics

## Student Experience

Shanxi Provincial Science and Technology Department

- (1) Demonstration project of CO<sub>2</sub> capture after combustion of the third generation low-energy compact coal-fired
- (2) Research and engineering demonstration on Strengthening technology of heavy metal coupling control of circulating fluidized bed coal-fired
- (3) Wet plume control technology of flue gas reheating
- (4) Study on dynamic stability of solar jet and CO<sub>2</sub> compression jet cascade refrigeration system

## Honors&Ability

Received first-class scholarship for graduate studies

Proficient in Office related software, Proficient in simulation software MATLAB, Aspen Plus and Ansys Fluent, drawing software CAD, UG, etc.

recent publication

[1] T. Bai, Z. Jin, Y. Yao,et al. Thermal Performance Analysis of Cooling Tower in Flue Gas Condensing. Journal of Electric Power,2022,37(01):1-9+57.

## Work experience

2022.09-2022.12 Project Assistant of Beijing Jingneng Power Co.,Ltd.

- (1) Investigate equipment problems and write technical analysis reports.
- (2) Explore the application of innovative technologies and propose project application plans.
- (3) Write project application and project feasibility analysis report.
- (4) Cooperate with project implementation and solve technical problems on site.
