# Supplementary material for: Adsorption properties and mechanism of Pb<sup>2+</sup> in hydrothermal carbon solution of modified banana peel
Source: Preprints.org preprint supplement (doi:10.20944/preprints202310.1866.v1), 2023-10-30
Supplement: Supplementary file 3 [file supplementary › 张璐明.pdf]

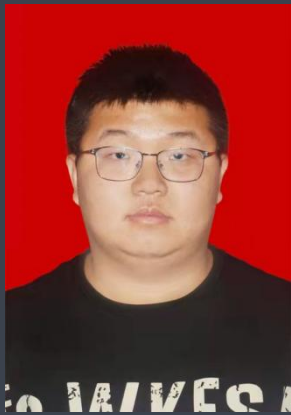

# Luming Zhang

## Basic information

gender: male

nation: the Han nationality

age: 24 years old

political outlook: Member of the CPC

phone: 17836211050

domicile: Linyi County, Shanxi Province

## Self evaluation

I am outgoing, enthusiastic, and approachable! Has strong organizational skills, takes work seriously and responsibly, has a strong sense of ambition and responsibility, follows superiors' arrangements, has certain communication skills, adapts to new things, has strong communication and coordination skills, and has a team spirit! Believe in being able to work!

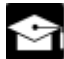

## Educational background

**2018.9-2022.7**

**Shanxi University**

energy and power engineering | undergraduate course

Majors

engineering thermodynamics, fluid mechanics, heat transfer, electrical engineering, boiler principles, mechanical design fundamentals, pumps and fans, steam turbine principles, thermal power plants, automatic regulation of thermal processes, etc.

Electives

metal materials, pollution control in thermal power plants, clean coal technology, circulating fluidized bed boilers, gas turbine technology, thermal equipment installation and maintenance, unit unit operation, etc.

**2023.9-so far**

**Shanxi University**

power engineering | postgraduate

Majors

Numerical analysis, advanced heat transfer, advanced engineering thmermodynaics, dialectics of nature

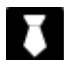

## Internship experience

**2019.6-2019.7**

**Douhe Power Plant**

intern

Job description: Understand the operational principles of various departments in thermal power plants, and combine the knowledge gained from classmates to master.

**2019.9-2019.10**

**Shanxi University**

Job description: Understand and operate various knowledge related to CNC lathes, milling workers, and fitters.

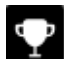

## certificate of honor

- 1.Received the title of Outstanding Student Cadre of Shanxi University for the 2020-2021 Academic Year in June 2021.
- 2.Received the Third Class Outstanding Student Academic Scholarship in October 2021.
- 3.In July 2022, he was awarded the title of "Outstanding Communist Party Member" at Shanxi University.
