# Supplementary material for: Adsorption properties and mechanism of Pb<sup>2+</sup> in hydrothermal carbon solution of modified banana peel
Source: Preprints.org preprint supplement (doi:10.20944/preprints202310.1866.v1), 2023-10-30
Supplement: Supplementary file 3 [file supplementary › 田来鑫.pdf]

# PERSONAL RESUME

## • Personal information

**Name :** Laixin Tian

**Professional :** Electrical Engineering

**Email :** comtianlaixin@geg.com.cn

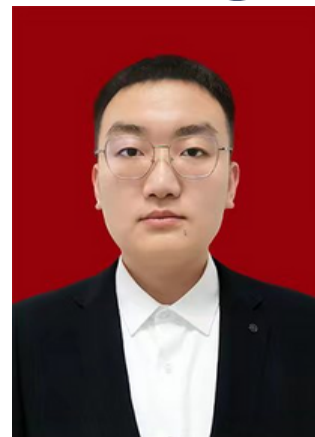

## • Education background

|                 |                                             |               |
|-----------------|---------------------------------------------|---------------|
| 2016.09-2020.07 | Shanxi University<br>Energy and Power       | Undergraduate |
| 2020.09-2023.05 | Shanxi University<br>Electrical Engineering | Master        |

## • Work Experience

Guangdong energy group      2023-Present

## • Recent publications

- 1.Tao Bai, Laixin Tian, Xue Zhao, etc. . Effect of reaction time on hydrothermal products of eggplant straw [ J ] . New Energy Progress, 2023,11(02) : 133-138.
- 2.Laixin Tian,Tao bai, etc. . An anti-blocking system for coal falling pipes of circulating fluidized bed boilers, notice no. B C N 216976782 U.
