# Supplementary material for: Adsorption properties and mechanism of Pb<sup>2+</sup> in hydrothermal carbon solution of modified banana peel
Source: Preprints.org preprint supplement (doi:10.20944/preprints202310.1866.v1), 2023-10-30
Supplement: Supplementary file 3 [file supplementary › 白涛.pdf]

# PERSONAL RESUME

## • Personal information

**Name :** Tao Bai      **Telephone:** 13453188475

**Professional :** Thermal Engineering

**Email :** hdbaitao@126.com

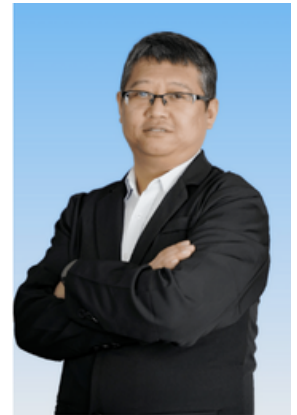

## • Education background

|                 |                                       |                 |
|-----------------|---------------------------------------|-----------------|
| 2001.09-2005.07 | North China Electric Power University |                 |
|                 | Thermal Power Engineering             | Undergraduate   |
| 2005.09-2008.04 | North China Electric Power University |                 |
|                 | Engineering thermal physics           | Master          |
| 2008.09-2014.04 | North China Electric Power University |                 |
|                 | Thermal Engineering                   | Doctor's degree |

## • Work Experience

|                                                                |                         |
|----------------------------------------------------------------|-------------------------|
| 2014.04-2014.11                                                | Technical Administrator |
| China Coal Pingshuo Group Electric Power Management Department |                         |
| 2014.12-2019.12                                                | Lecturer                |
| Department of Power Engineering, Shanxi University             |                         |

## • Recent publications

- 1.Tao Bai, Zhiping Jin. Thermodynamic analysis of condensation water saving and waste heat recovery of coal-fired flue gas [ J ] . Journal of Power Engineering, 2022,42(10) : 978-985.
- 2.English for thermal and power engineering (4th edition) , China Electric Power Education Press, 2017, ed.
- 3.Foundation of thermal engineering and Fluid Mechanics, 2nd edition, China Water Conservancy and Hydropower Press, 2018, ed.
